# Supplementary material
Source: Springer Nature journal article supplement (https://www.springermedizin.de/resource/supplementary/12906_2010_359_MOESM3_ESM.pdf/9519532)

**a**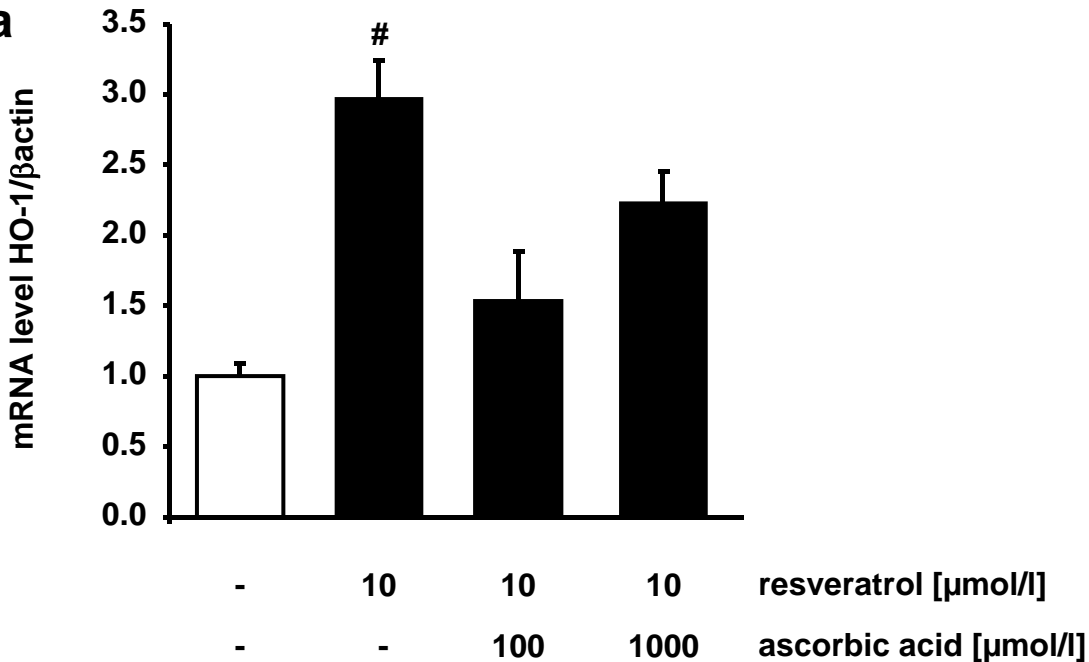**b**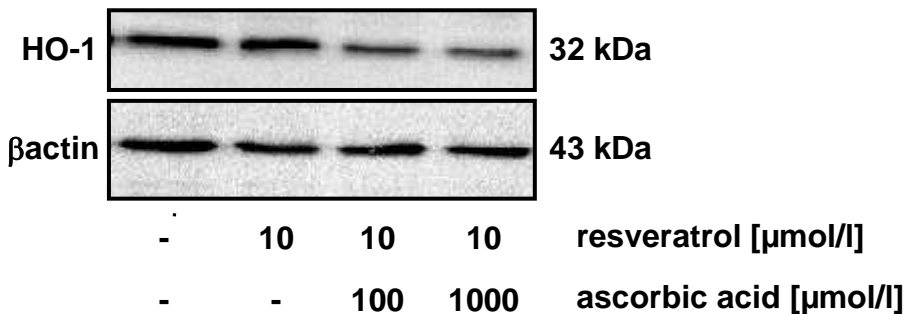

Supplement: MOESM3 [file 9519532]
